# Supplementary material for: Phosphine-stabilized Pd nanoparticles supported on silica as a highly active catalyst for the Suzuki–Miyaura cross-coupling reaction
Source: Royal Society of Chemistry journal article supplement (doi:10.1039/c4ra11186a), 2014-12-03
Supplement: c4ra11186a1.pdf [file c4ra11186a1.pdf]

Supplementary information for

**Phosphine-stabilized Pd nanoparticles supported on silica as highly active catalyst for Suzuki-Miyaura cross-coupling reaction**

**Debojeet Sahu and Pankaj Das**

*Department of Chemistry, Dibrugarh University, Dibrugarh-786004, Assam, India.*

**Table S1** Textural data of the silica-based materials.

| Materials                                | Surface area*<br>(m <sup>2</sup> /g) | Pore volume*<br>(cm <sup>3</sup> /g) | Pore diameter*<br>(nm) |
|------------------------------------------|--------------------------------------|--------------------------------------|------------------------|
| PPh <sub>2</sub> -SiO <sub>2</sub>       | 181                                  | 0.24                                 | 3.81                   |
| PdNP @PPh <sub>2</sub> -SiO <sub>2</sub> | 100                                  | 0.19                                 | 3.70                   |

\*Determined by BET method.

**Table S2** Optimization of temperature and catalyst quantity for Suzuki-Miyaura cross coupling reaction of *p*-bromoanisole with phenylboronic acid.<sup>a</sup>

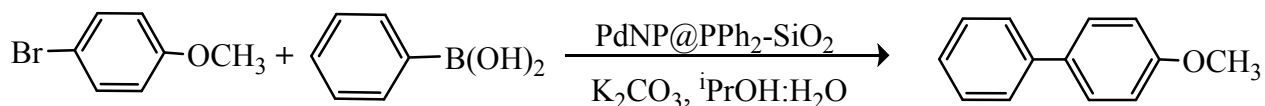

| Entry | Catalyst (mol%) | Temp (°C) | Time (h) | Yield (%) <sup>b</sup> |
|-------|-----------------|-----------|----------|------------------------|
| 1     | 0.5             | 100       | 2.0      | 100                    |
| 2     | 0.5             | 80        | 2.0      | 100                    |
| 3     | 0.5             | 60        | 3.0      | 100                    |
| 4     | 0.5             | RT        | 6.0      | 16                     |
| 5     | 0.3             | 60        | 3.0      | 100                    |
| 6     | 0.1             | 60        | 3.5      | 100                    |
| 7     | 0.05            | 60        | 6.0      | 86                     |
| 8     | 0.01            | 60        | 6.0      | 60                     |

<sup>a</sup>Reaction conditions: 0.5 mmol *p*-bromoanisole, 0.75 mmol phenylboronic acid, 1.5 mmol K<sub>2</sub>CO<sub>3</sub>, 6 mL *i*PrOH:H<sub>2</sub>O (1:1).

<sup>b</sup>GC yield.

**Table S3** Optimization of reaction conditions for Suzuki-Miyaura cross coupling of *p*-chloronitrobenzene with phenylboronic acid.<sup>a</sup>

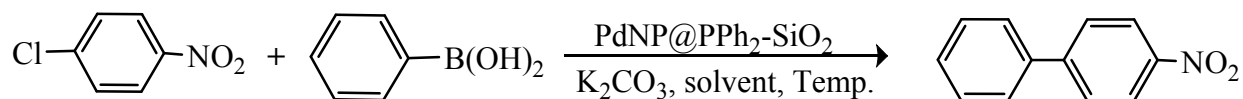

| Entry | Solvent                        | Catalyst (mol%) | Temp (°C) | Time (h) | Yield (%) <sup>b</sup> |
|-------|--------------------------------|-----------------|-----------|----------|------------------------|
| 1     | <i>i</i> PrOH-H <sub>2</sub> O | 0.1             | 60        | 6        | 17                     |
| 2     | <i>i</i> PrOH-H <sub>2</sub> O | 0.3             | 80        | 8        | 28                     |
| 3     | <i>i</i> PrOH-H <sub>2</sub> O | 0.5             | 100       | 8        | 31                     |
| 4     | <i>i</i> PrOH                  | 0.5             | 100       | 8        | 56                     |
| 5     | DMF                            | 0.5             | 100       | 5        | 96                     |
| 6     | DMF-H <sub>2</sub> O           | 0.5             | 100       | 5        | 61                     |
| 7     | Toluene                        | 0.5             | 100       | 5        | 64                     |
| 8     | THF                            | 0.5             | 100       | 5        | 41                     |
| 9     | DMF                            | 0.2             | 100       | 6        | 64                     |
| 10    | DMF                            | 0.1             | 100       | 6        | 43                     |

<sup>a</sup>Reaction conditions: 0.5 mmol *p*-chloronitrobenzene, 0.75 mmol phenylboronic acid, 1.5 mmol K<sub>2</sub>CO<sub>3</sub>.

<sup>b</sup>GC yield.

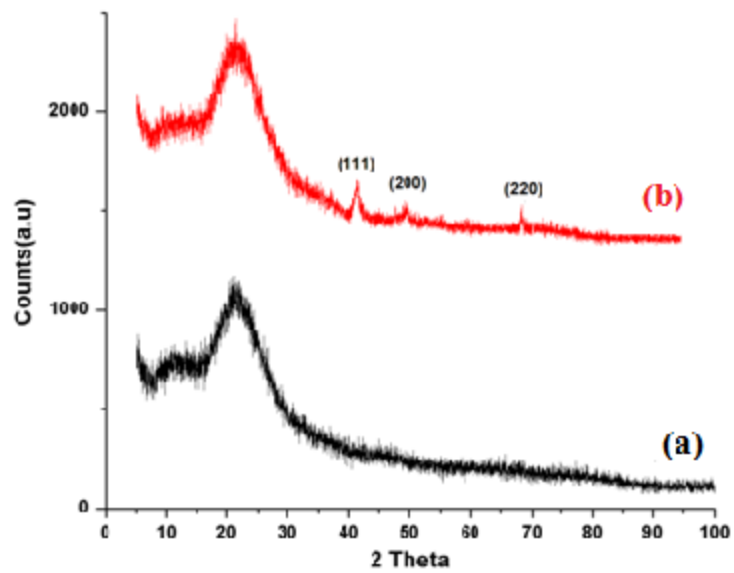

**Fig. S1** The powder XRD patterns of (a) PPh<sub>2</sub>-SiO<sub>2</sub> and (b) PdNP@PPh<sub>2</sub>-SiO<sub>2</sub>.

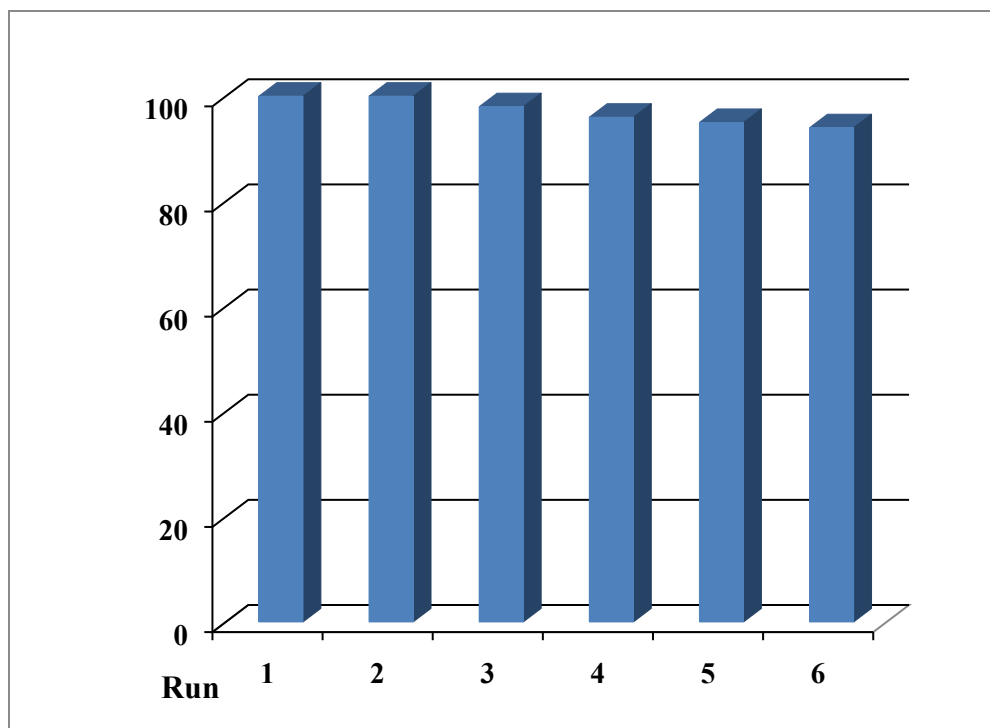

**Fig. S2** Bar diagram showing the recyclability of the coupling reaction between *p*-bromoanisole and phenylboronic acid using PdNP@PPh<sub>2</sub>-SiO<sub>2</sub>.

### **<sup>1</sup>H NMR and mass spectral data of the coupling products:**

**4-Methoxybiphenyl (Table 1, entry 1 and Table 2, entry 7):** <sup>1</sup>H NMR (300 MHz, CDCl<sub>3</sub>): δ(ppm) 7.56 (tt, *J* = 1.5 and 4.7 Hz, 4H), 7.42 (t, *J* = 7.4 and 7.8, 2H), 7.29 (tt, *J* = 6.9 Hz, 1H), 6.98 (d, *J* = 8.5 Hz, 2H), 3.85 (s, 3H, CH<sub>3</sub>); GC-MS (m/z): 184 (M<sup>+</sup>)

**Biphenyl (Table 1, entry 2 and Table 2, entry 4):** <sup>1</sup>H NMR (400 MHz, CDCl<sub>3</sub>): δ(ppm) 7.60 (d, *J* = 7.6 Hz, 4H), 7.45 (t, *J* = 6.8 Hz, 4H), 7.36 (t, *J* = 7.2 Hz, 2H); GC-MS (m/z): 153.8 (M<sup>+</sup>)

**Biphenyl-4-carbaldehyde (Table 1, entry 3 and Table 2, entry 5):** <sup>1</sup>H NMR (300 MHz, CDCl<sub>3</sub>): δ(ppm) 10.05 (s, 1H, CH=O), 7.95 (d, *J* = 8.2 Hz, 2H), 7.74 (d, *J* = 8.1 Hz, 2H), 7.63 (d, *J* = 8.2 Hz, 2H), 7.38-7.50 (m, 3H); GC-MS (m/z): 181.9 (M<sup>+</sup>)

**4-Methylbiphenyl (Table 1, entry 4):** <sup>1</sup>H NMR (400 MHz, CDCl<sub>3</sub>): δ(ppm) 7.57 (d, *J* = 7.6 Hz, 2H), 7.49 (d, *J* = 8 Hz, 2H), 7.42 (t, *J* = 7.6 and 8.0 Hz, 2H), 7.36 (dd, *J* = 6.2 and 4 Hz, 1H), 7.25 (d, *J* = 8 Hz, 2H), 2.39 (s, 3H, CH<sub>3</sub>); GC-MS (m/z): 167.9 (M<sup>+</sup>)

**Biphenyl-2-carbaldehyde (Table 1, entry 5):** <sup>1</sup>H NMR (400 MHz, CDCl<sub>3</sub>): δ(ppm) 9.78 (s, 1H, CHO), 7.92 (d, *J* = 8.2 Hz, 1H), 7.68 (t, *J* = 7.8 Hz, 1H), 7.53-7.44 (m, 5H), 7.36-7.39 (m, 2H); GC-MS (m/z): 182.1 (M<sup>+</sup>)

**2,5-dimethoxybiphenyl (Table 1, entry 6):** <sup>1</sup>H NMR (400 MHz, CDCl<sub>3</sub>): δ(ppm) 7.56 (d, *J* = 3.2 Hz, 2H), 7.43 (t, *J* = 7.2 and 8 Hz, 2H), 7.35 (t, *J* = 7.2 and 7.6 Hz, 1H), 7.15 (d, *J* = 2.8 Hz, 1H), 6.95 (s, 1H), 6.88 (d, *J* = 2.8 Hz, 1H), 3.87 (s, 3H, CH<sub>3</sub>), 3.83 (s, 3H, CH<sub>3</sub>); GC-MS (m/z): 214 (M<sup>+</sup>)

**4-Benzoylbiphenyl (Table 1, entry 7):** <sup>1</sup>H NMR (400 MHz, CDCl<sub>3</sub>): δ(ppm) 7.90 (d, *J* = 8.4 Hz, 2H), 7.84 (d, *J* = 8.4 Hz, 2H), 7.71 (d, *J* = 8.4 Hz, 2H), 7.65 (d, *J* = 8 Hz, 2H), 7.60 (t, *J* = 7.6 and 7.2 Hz, 1H), 7.52-7.46 (m, 4H), 7.41 (t, *J* = 7.6 Hz, 1H);

**5-Phenylpyrimidine (Table 1, entry 8):** <sup>1</sup>H NMR (400 MHz, CDCl<sub>3</sub>): δ(ppm) 9.36 (s, 1H), 9.05 (s, 2H), 8.17 (d, *J* = 6.8 Hz, 2H), 7.58-7.44 (m, 3H); GC-MS (m/z): 155.8 (M<sup>+</sup>)

**3-methyl-2-phenylthiophene (Table 1, entry 9):** <sup>1</sup>H NMR (400 MHz, CDCl<sub>3</sub>): δ(ppm) 7.46 (d, *J* = 6.8 Hz, 2H), 7.39 (t, *J* = 7.6 Hz, 2H), 7.30 (dd, *J* = 6.4 and 7.2 Hz, 1H), 7.18 (d, *J* = 5.2 Hz, 1H), 6.91 (d, *J* = 4.8 Hz, 1H), 2.31 (s, 3H, CH<sub>3</sub>); GC-MS (m/z): 173.9 (M<sup>+</sup>)

**4-Methoxy-4'-methylbiphenyl (Table 1, entry 10):** <sup>1</sup>H NMR (400 MHz, CDCl<sub>3</sub>): δ(ppm) 7.50 (d, *J* = 8.4 Hz, 2H), 7.44 (d, *J* = 8 Hz, 2H), 7.22 (d, *J* = 8 Hz, 2H), 6.96 (d, *J* = 8.4 Hz, 2H), 3.86 (s, 3H, O-CH<sub>3</sub>), 2.39 (s, 3H, CH<sub>3</sub>); GC-MS (m/z): 199.9 (M<sup>+</sup>)

**3-Nitrobiphenyl (Table 1, entry 11 and Table 2, entry 2):** <sup>1</sup>H NMR (400 MHz, CDCl<sub>3</sub>): δ(ppm) 8.44 (s, 1H), 8.20 (d, *J* = 7.8 Hz, 1H), 7.92 (d, *J* = 7.6 Hz, 1H), 7.59-7.63 (m, 3H), 7.48-7.53 (m, 2H), 7.45 (t, *J* = 7.2 Hz, 1H); GC-MS (m/z): 200 (M<sup>+</sup>)

**4-Nitrobiphenyl (Table 2, entry 1):**  $^1\text{H}$  NMR (400 MHz,  $\text{CDCl}_3$ ):  $\delta$ (ppm) 8.30 (d,  $J = 8.8$  Hz, 2H), 7.73 (d,  $J = 8.8$  Hz, 2H), 7.62 (d,  $J = 7.2$  Hz, 2H), 7.52-7.43 (m, 3H); GC-MS (m/z): 200 ( $\text{M}^+$ )

**2-Nitrobiphenyl (Table 2, entry 3):**  $^1\text{H}$  NMR (400 MHz,  $\text{CDCl}_3$ ):  $\delta$ (ppm) 7.95 (d,  $J = 8.4$  Hz, 1H), 7.72 (t,  $J = 7.6$  Hz, 1H), 7.57 (t,  $J = 7.6$  Hz, 1H), 7.52 (d,  $J = 8.0$  Hz, 1H), 7.48-7.43 (m, 3H), 7.37 (d,  $J = 7.8$  Hz, 2H); GC-MS (m/z): 200 ( $\text{M}^+$ )

**4-Acetylbiphenyl (Table 2, entry 6):**  $^1\text{H}$  NMR (500 MHz,  $\text{CDCl}_3$ ):  $\delta$ (ppm) 8.06 (d, 2H,  $J = 8.5$  Hz), 7.71 (d, 2H,  $J = 8.5$  Hz), 7.66 (d, 2H,  $J = 7$  Hz), 7.5 (t, 2H,  $J = 7$  and 8 Hz), 7.43 (t, 1H,  $J = 7$  Hz), 2.66 (s, 3H,  $\text{CH}_3$ ); GC-MS (m/z): 196 ( $\text{M}^+$ )

**4-Biphenylmethanol (Table 2, entry 8):**  $^1\text{H}$  NMR (400 MHz,  $\text{CDCl}_3$ ):  $\delta$ (ppm) 7.66-7.62 (m, 4H), 7.45-7.39 (m, 4H), 7.35-7.32 (m, 1H), 4.50 (s, 2H,  $\text{CH}_2$ ), 3.02 (s, 1H, OH); GC-MS (m/z): 183.8 ( $\text{M}^+$ )

**3-Biphenylmethanol (Table 2, entry 9):**  $^1\text{H}$  NMR (400 MHz,  $\text{CDCl}_3$ ):  $\delta$ (ppm) 7.82 (s, 1H), 7.63-7.55 (m, 2H), 7.46-7.42 (m, 3H), 7.32-7.28 (m, 3H), 4.52 (s, 2H,  $\text{CH}_2$ ), 2.90 (s, 1H, OH); GC-MS (m/z): 183.4 ( $\text{M}^+$ )

**4-methyl-4'-nitrobiphenyl (Table 2, entry 10):**  $^1\text{H}$  NMR (400 MHz,  $\text{CDCl}_3$ ):  $\delta$ (ppm)  $^1\text{H}$  NMR (500 MHz,  $\text{CDCl}_3$ )  $\delta$  (ppm): 8.28 (d, 2H,  $J = 8.6$  Hz), 7.75 (d, 2H,  $J = 8.6$  Hz), 7.58 (d, 2H,  $J = 7.4$  Hz), 7.46 (d, 2H,  $J = 7.4$  Hz), 2.41 (s, 3H,  $\text{CH}_3$ ); GC-MS (m/z): 213.1 ( $\text{M}^+$ )

**4-chloro-4'-nitrobiphenyl (Table 2 entry 11)**  $^1\text{H}$  NMR (500 MHz,  $\text{CDCl}_3$ ):  $\delta$ (ppm) 8.32 (d, 2H,  $J = 10$  Hz), 7.73 (d, 2H,  $J = 9$  Hz), 7.58 (d, 2H,  $J = 8.5$  Hz), 7.49 (d, 2H,  $J = 8.5$  Hz); GC-MS (m/z): 233 ( $\text{M}^+$ )
